# Supplementary material for: Hierarchical macrotube/mesopore carbon decorated with mono-dispersed Ag nanoparticles as a highly active catalyst
Source: Royal Society of Chemistry journal article supplement (doi:10.1039/c5gc00123d), 2015-01-01
Supplement: c5gc00123d1.pdf [file c5gc00123d1.pdf]

Supporting Information for

**Hierarchical Macrotube/Mesopore Carbon Decorated  
with Mono-dispersed Ag Nanoparticles as Highly Active  
Catalyst**

Tuo Ji, † Long Chen, † Michael Schmitz, † Forrest Sheng Bao‡ and Jiahua Zhu†\*

† Intelligent Composites Laboratory, Department of Chemical and Biomolecular Engineering, The University of Akron, Akron, OH 44325 USA

‡ Department of Electrical and Computer Engineering, The University of Akron, Akron, OH 44325 USA

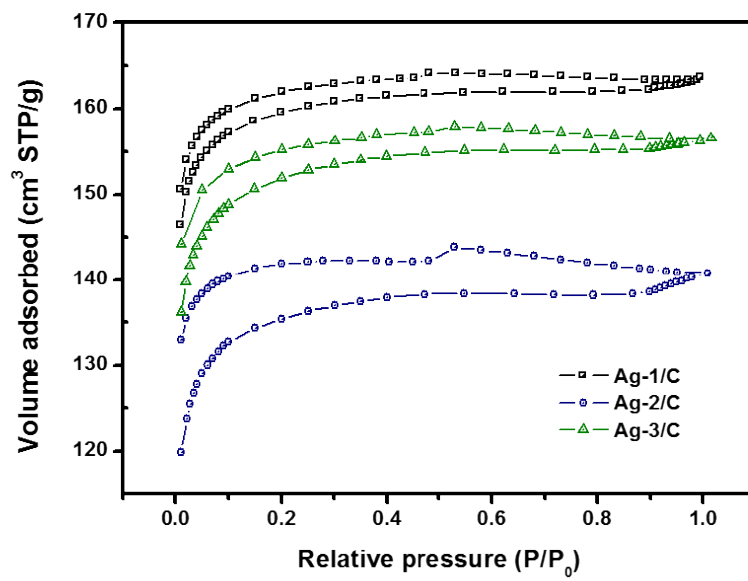

**Fig. S1** Nitrogen adsorption–desorption isotherm of Ag-1/C, Ag-2/C and Ag-3/C.

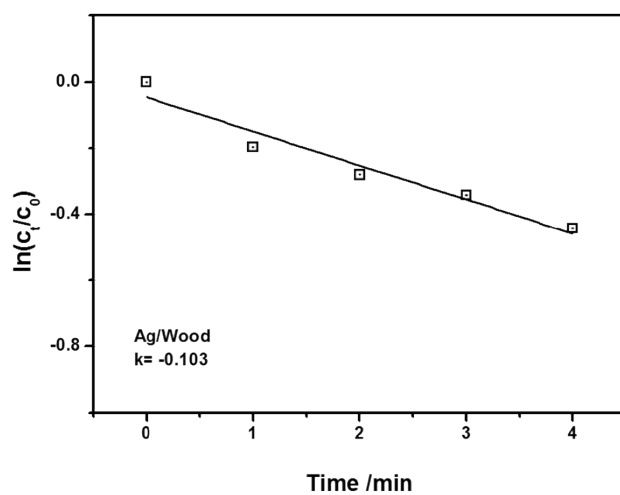

**Fig. S2.** Plots of  $\ln[C_t/C_0]$  versus reaction time for the reduction of 4-NP with  $\text{NaBH}_4$  over Ag/Wood.  $[\text{NP}] = 0.5 \text{ mM}$ ,  $[\text{NaBH}_4]/[\text{4-NP}] = 80$ , catalysts amount: 4-NP: 0.16 mg/mL

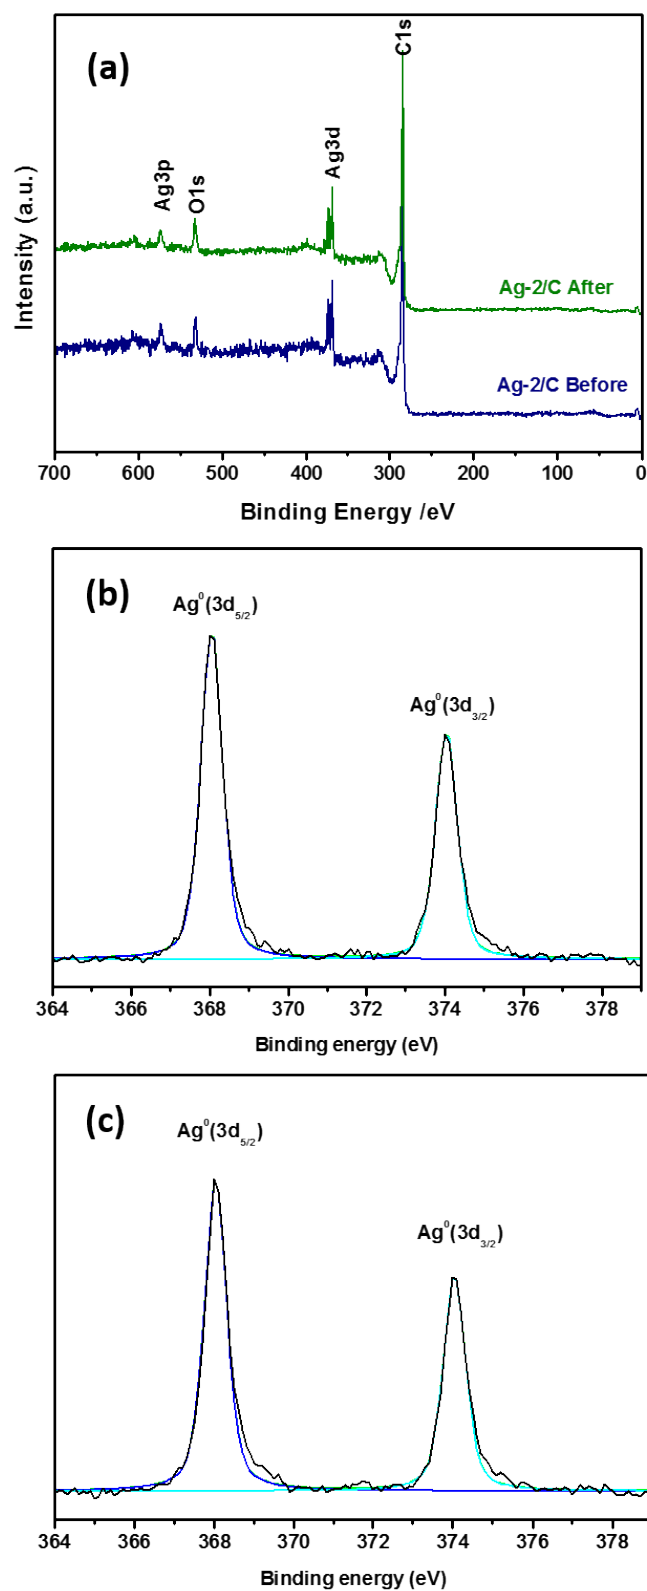

**Fig. S3** (a) XPS full scanned spectra of Ag-wood, Ag-2/C before and after reaction (b) Ag 3d of as synthesized Ag-2/C, (c) Ag 3d of Ag-2/C after reaction.

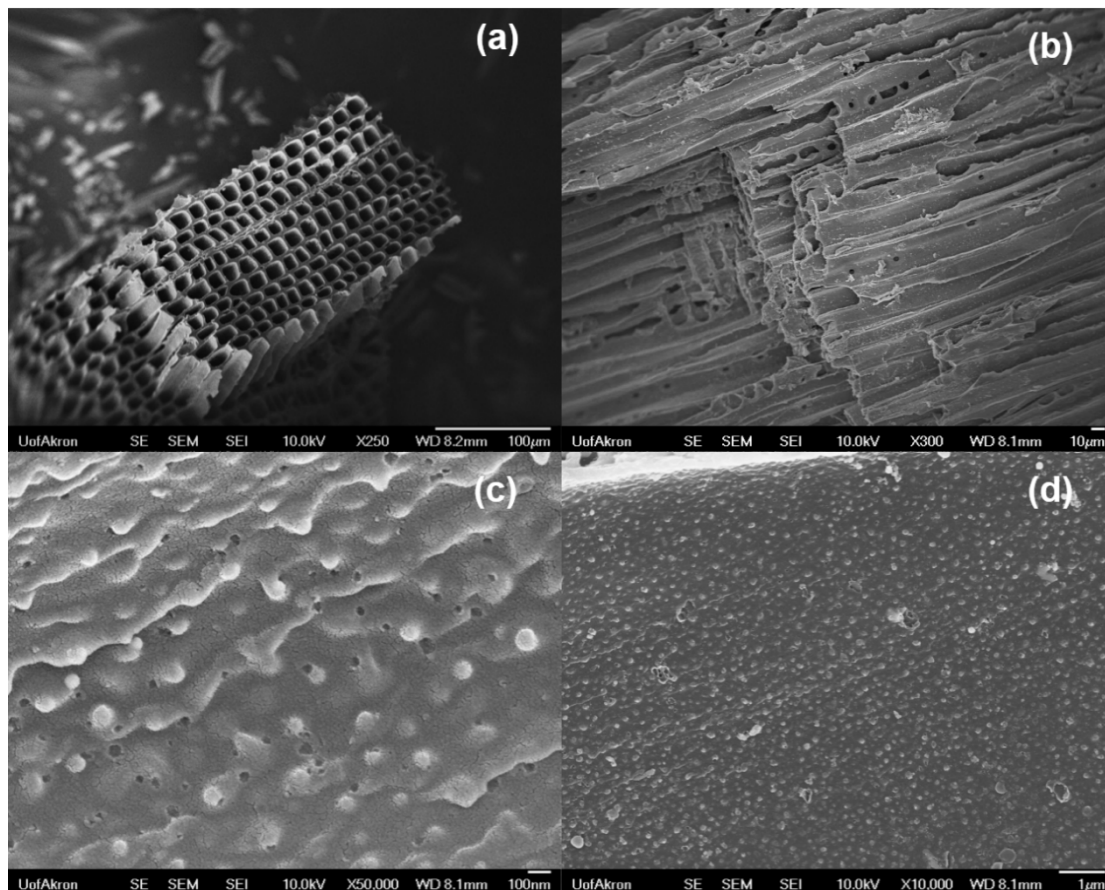

**Fig.S4** SEM of (a) top-view, (b) side-view (c) (d) enlarged magnification of side view of Ag-2/C after 10 cycles reaction.
